# Supplementary material for: The interactions between TiO2 and graphene with surface inhomogeneity determined using density functional theory
Source: Royal Society of Chemistry journal article supplement (doi:10.1039/c5cp04073f), 2015-01-01
Supplement: c5cp04073f1.pdf [file c5cp04073f1.pdf]

### Supporting Information

Coordinate files (xyz format) for the graphene/TiO<sub>2</sub> structures can be found at the following address:

<https://github.com/Deskings-group>
